# Supplementary material for: Tris(t-butyl)terpyridine-copper(ii) complexes and ligand field effects
Source: Royal Society of Chemistry journal article supplement (doi:10.1039/b809894h), 2008-12-17
Supplement: b809894h.pdf [file b809894h.pdf]

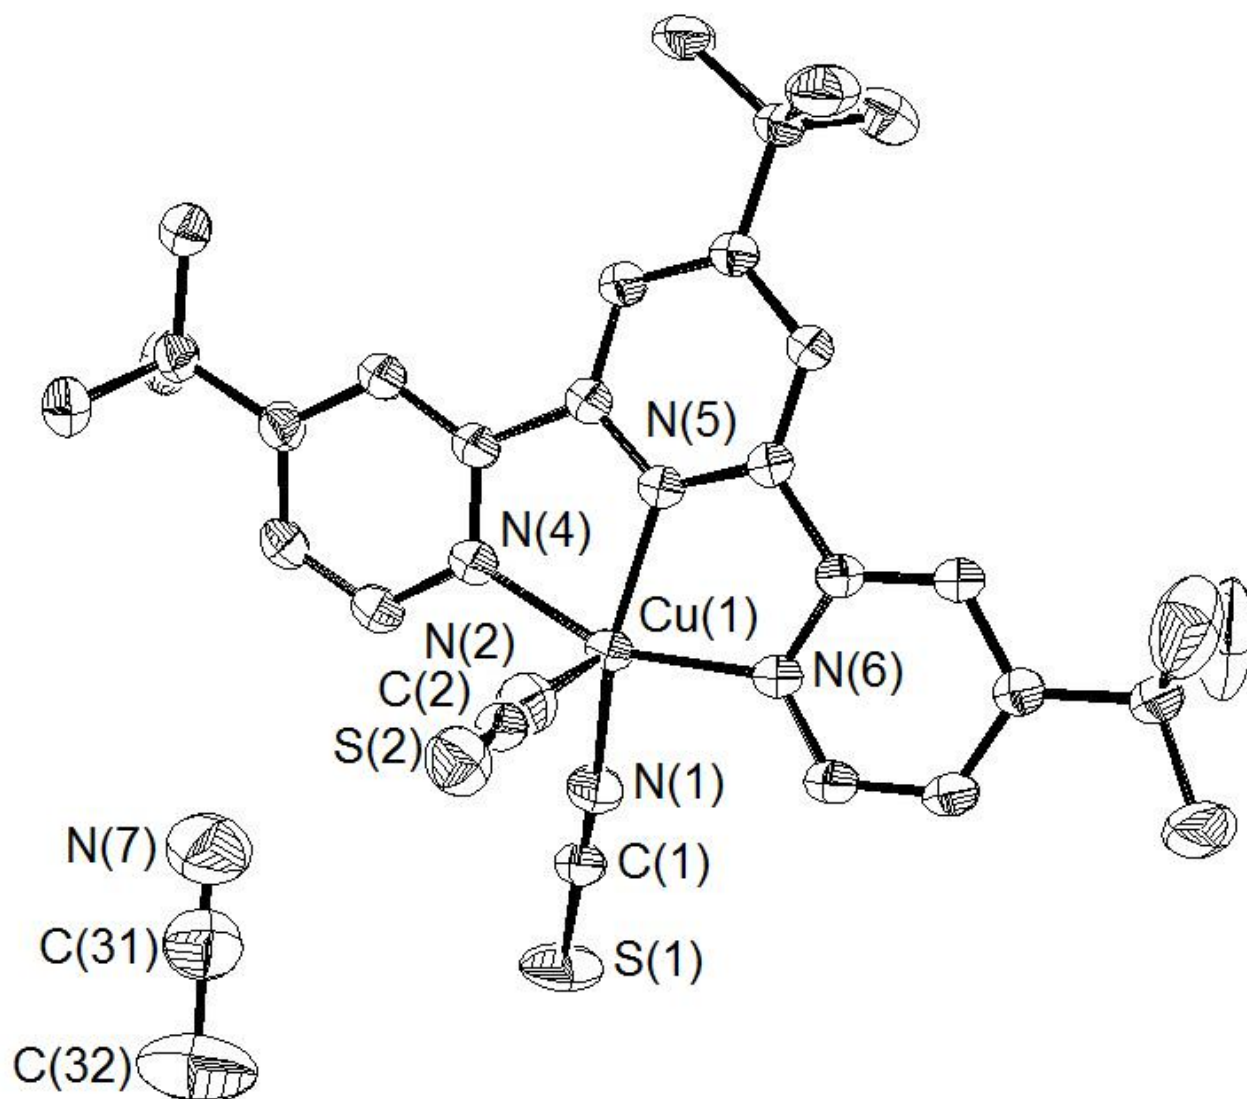

<sup>5</sup> **Figure S1** ORTEP of **3b** with ellipsoids at 50% level and hydrogen atoms omitted for clarity.

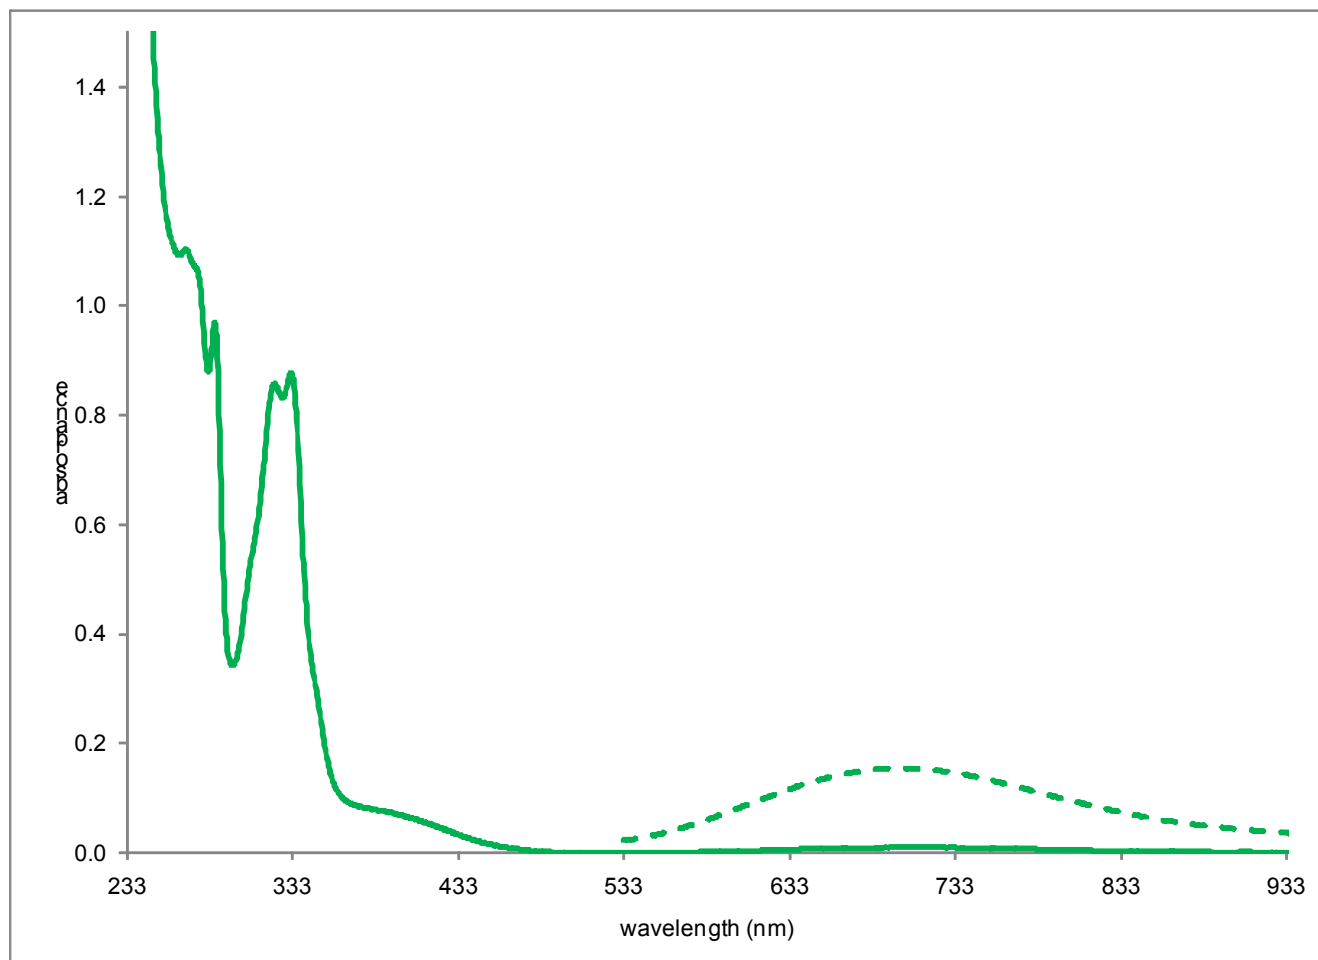

**Figure S2** UV-vis absorption spectrum for **2** (18.5 mg) dissolved in  $\text{CH}_2\text{Cl}_2$  (5 ml) and serially diluted 1 ml solution to 10 ml twice (solid line) and **2** (18.5 mg) dissolved in  $\text{CH}_2\text{Cl}_2$  (5 ml) (dashed line, insert). See text for discussion of species present.

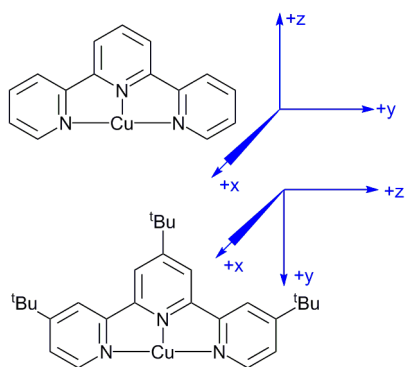

**Figure S3** Cartesian coordinate systems used in DFT calculations with Cu at {0,0,0}.

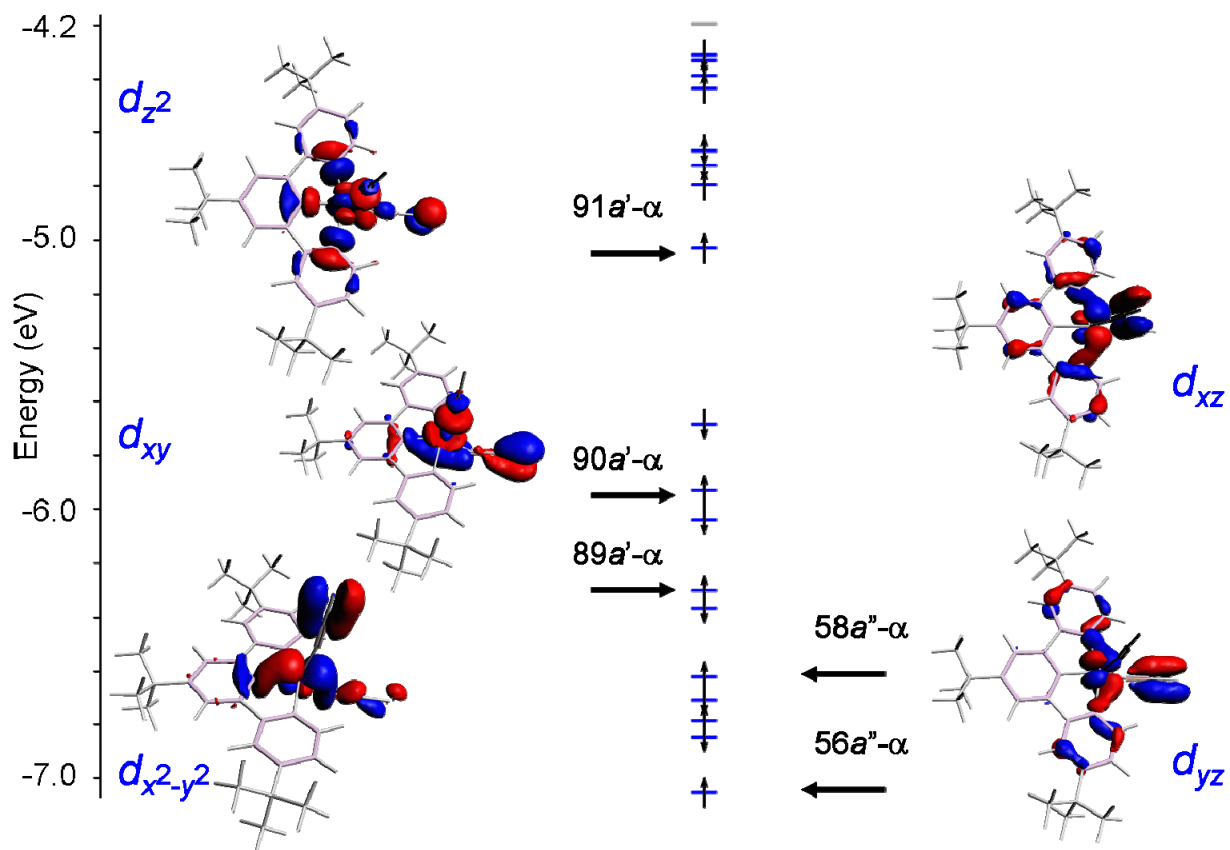

**Figure S3** Energy level diagram for  $[\text{Cu}(\text{L}_3')(\text{NCS})_2]$  in  $C_s$  symmetry based on **3b** showing  $\alpha$ -spin orbitals only.

**Table S1.** Orbital compositions for frontier orbitals in DFT calculations.

**[Cu(terpy)(NCS)<sub>2</sub>] in C<sub>2</sub> Symmetry**

5 List of all MOs, ordered by energy, with the most significant SFO gross populations

Each percentage contribution in the table below corresponds to the indicated SFO.  
In general, a SFO may be a linear combination of several Fragment Orbitals on the same,  
10 or on symmetry-related Fragments. Only the first 'member' of such a combination is  
specified here. A full definition of all SFOs is given in an earlier part of the output.  
The numbering of the SFOs in this table does NOT include the Core Orbitals, and starts  
from one for each symmetry representation, as in the SFO definition list earlier.

15

\*\*\* SPIN 1 \*\*\*

| E(eV)  | Occ  | MO     | %         | SFO (first member) | E(eV)  | Occ  | Fragment |
|--------|------|--------|-----------|--------------------|--------|------|----------|
| -7.446 | 1.00 | 50 A   | 60.76%    | 1 D:xy             | -5.630 | 2.00 | 1 Cu     |
|        |      | 8.50%  | 1 P:x     | -5.430 0.67        |        |      | 11 C     |
|        |      | 7.48%  | 1 P:x     | -5.430 0.67        |        |      | 8 C      |
|        |      | 3.68%  | 1 P:x     | -5.430 0.67        |        |      | 9 C      |
|        |      | 2.83%  | 1 P:x     | -5.430 0.67        |        |      | 13 C     |
|        |      | 2.27%  | 2 P:y     | -7.128 1.33        |        |      | 24 S     |
|        |      | 2.09%  | 1 P:z     | -5.430 0.67        |        |      | 15 C     |
|        |      | 1.78%  | 1 P:x     | -5.430 0.67        |        |      | 14 C     |
|        |      | 1.49%  | 2 P:z     | -7.128 1.33        |        |      | 24 S     |
|        |      | 1.15%  | 1 P:x     | -5.430 0.67        |        |      | 10 C     |
|        |      | 1.14%  | 1 P:x     | -7.265 1.00        |        |      | 2 N      |
|        |      | 1.13%  | 1 P:y     | -5.430 0.67        |        |      | 15 C     |
| -7.295 | 1.00 | 47 B   | 53.24%    | 1 D:yz             | -5.630 | 2.00 | 1 Cu     |
|        |      | 8.44%  | 1 P:y     | -7.265 1.00        |        |      | 2 N      |
|        |      | 3.96%  | 2 P:y     | -7.128 1.33        |        |      | 24 S     |
|        |      | 3.71%  | 1 P:x     | -5.430 0.67        |        |      | 15 C     |
|        |      | 3.07%  | 1 P:z     | -5.430 0.67        |        |      | 15 C     |
|        |      | 2.84%  | 2 P:x     | -7.128 1.33        |        |      | 24 S     |
|        |      | 2.65%  | 1 P:y     | -5.430 0.67        |        |      | 15 C     |
|        |      | 2.36%  | 1 P:y     | -7.265 1.00        |        |      | 4 N      |
|        |      | 1.65%  | 1 P:x     | -5.430 0.67        |        |      | 10 C     |
|        |      | 1.56%  | 2 S       | -18.424 2.00       |        |      | 2 N      |
|        |      | 1.52%  | 2 P:z     | -7.128 1.33        |        |      | 24 S     |
|        |      | 1.28%  | 1 P:x     | -5.430 0.67        |        |      | 8 C      |
|        |      | 1.27%  | 3 P:y     | -0.074 0.00        |        |      | 1 Cu     |
|        |      | 1.19%  | 1 P:y     | -5.430 0.67        |        |      | 11 C     |
|        |      | 1.08%  | 1 P:x     | -5.430 0.67        |        |      | 7 C      |
| -7.053 | 1.00 | 51 A   | 23.35%    | 1 P:x              | -5.430 | 0.67 | 13 C     |
|        |      | 16.96% | 1 P:x     | -5.430 0.67        |        |      | 10 C     |
|        |      | 11.66% | 1 D:xy    | -5.630 2.00        |        |      | 1 Cu     |
|        |      | 10.95% | 1 P:x     | -5.430 0.67        |        |      | 7 C      |
|        |      | 10.25% | 1 P:x     | -5.430 0.67        |        |      | 8 C      |
|        |      | 8.76%  | 1 P:x     | -5.430 0.67        |        |      | 14 C     |
|        |      | 5.93%  | 1 P:x     | -5.430 0.67        |        |      | 11 C     |
|        |      | 2.35%  | 1 P:x     | -7.265 1.00        |        |      | 2 N      |
| -6.715 | 1.00 | 52 A   | 31.55%    | 1 D:z2             | -5.630 | 2.00 | 1 Cu     |
|        |      | 26.79% | 1 D:x2-y2 | -5.630 2.00        |        |      | 1 Cu     |

55

7.72% 2 P:z -7.128 1.33 24 S  
 6.22% 1 P:z -7.265 1.00 3 N  
 4.01% 2 P:x -7.128 1.33 24 S  
 3.68% 3 P:z -0.074 0.00 1 Cu  
 5 3.55% 1 P:x -5.430 0.67 15 C  
 2.92% 1 P:z -5.430 0.67 15 C  
 2.24% 1 P:y -7.265 1.00 4 N  
 2.03% 2 S -18.424 2.00 4 N  
 1.21% 2 S -18.424 2.00 3 N  
 10 1.15% 1 P:y -5.430 0.67 15 C  
 -6.498 1.00 48 B 49.60% 1 D:xz -5.630 2.00 1 Cu  
 7.31% 2 P:x -7.128 1.33 24 S  
 6.86% 2 S -18.424 2.00 4 N  
 6.41% 1 P:y -7.265 1.00 4 N  
 15 4.98% 3 P:x -0.074 0.00 1 Cu  
 3.13% 1 P:z -7.265 1.00 4 N  
 2.29% 1 P:x -5.430 0.67 15 C  
 2.19% 1 P:x -5.430 0.67 14 C  
 2.15% 1 P:x -5.430 0.67 8 C  
 20 1.68% 1 P:x -5.430 0.67 12 C  
 1.64% 1 P:x -5.430 0.67 11 C  
 1.41% 1 P:y -5.430 0.67 15 C  
 1.34% 2 D:xz 11.536 0.00 1 Cu  
 1.14% 1 D:yz -5.630 2.00 1 Cu  
 25 -5.619 1.00 53 A 24.26% 2 P:x -7.128 1.33 24 S  
 12.93% 1 D:x2-y2 -5.630 2.00 1 Cu  
 11.14% 1 P:y -7.265 1.00 4 N  
 8.77% 1 P:y -7.265 1.00 2 N  
 8.10% 1 D:z2 -5.630 2.00 1 Cu  
 30 5.04% 2 P:y -7.128 1.33 24 S  
 5.02% 1 P:z -7.265 1.00 3 N  
 3.98% 1 P:x -7.265 1.00 4 N  
 3.50% 2 S -18.424 2.00 4 N  
 2.45% 2 P:z -7.128 1.33 24 S  
 35 1.90% 2 S -18.424 2.00 2 N  
 1.48% 2 D:x2-y2 11.536 0.00 1 Cu  
 -5.174 1.00 49 B 32.02% 2 P:z -7.128 1.33 24 S  
 22.01% 2 P:y -7.128 1.33 24 S  
 12.29% 1 P:y -7.265 1.00 4 N  
 40 9.73% 1 P:z -7.265 1.00 4 N  
 7.41% 2 P:x -7.128 1.33 24 S  
 2.10% 1 P:x -7.265 1.00 4 N  
 1.80% 1 D:yz -5.630 2.00 1 Cu  
 1.25% 3 P:x -0.074 0.00 1 Cu  
 45 1.21% 1 D:xz -5.630 2.00 1 Cu  
 1.06% 1 P:x -5.430 0.67 9 C  
 -4.943 1.00 54 A 36.34% 2 P:x -7.128 1.33 24 S  
 14.82% 1 D:z2 -5.630 2.00 1 Cu  
 13.34% 1 P:x -7.265 1.00 4 N  
 50 7.30% 1 P:y -7.265 1.00 2 N  
 5.08% 1 P:z -7.265 1.00 3 N  
 4.74% 2 P:z -7.128 1.33 24 S  
 3.37% 1 D:x2-y2 -5.630 2.00 1 Cu  
 2.03% 2 S -18.424 2.00 2 N  
 55 1.75% 2 D:z2 11.536 0.00 1 Cu  
 1.73% 1 P:z -7.265 1.00 4 N  
 1.00% 2 P:y -7.128 1.33 24 S  
 -4.876 1.00 50 B 47.36% 2 P:x -7.128 1.33 24 S

20.96% 1 P:x -7.265 1.00 4 N  
 17.15% 2 P:z -7.128 1.33 24 S  
 6.19% 1 P:z -7.265 1.00 4 N  
 3.21% 1 D:xz -5.630 2.00 1 Cu  
 5 -4.861 1.00 55 A 38.52% 2 P:z -7.128 1.33 24 S  
 17.44% 1 P:z -7.265 1.00 4 N  
 17.30% 2 P:y -7.128 1.33 24 S  
 8.81% 1 D:x2-y2 -5.630 2.00 1 Cu  
 5.11% 1 P:y -7.265 1.00 4 N  
 10 3.83% 1 P:y -7.265 1.00 2 N  
 1.60% 1 D:xy -5.630 2.00 1 Cu  
 1.13% 2 S -18.424 2.00 2 N  
 -3.782 0.00 51 B 19.05% 1 P:x -7.265 1.00 3 N  
 14.04% 1 P:x -5.430 0.67 14 C  
 15 13.76% 1 P:x -5.430 0.67 12 C  
 10.40% 1 P:x -5.430 0.67 10 C  
 10.36% 1 P:x -7.265 1.00 2 N  
 8.36% 1 P:x -5.430 0.67 7 C  
 6.90% 1 P:x -5.430 0.67 9 C  
 20 3.99% 1 D:xz -5.630 2.00 1 Cu  
 3.57% 1 P:x -5.430 0.67 13 C  
 2.34% 1 P:x -5.430 0.67 8 C  
 -2.13% 2 P:x 7.646 0.00 3 N  
 1.53% 2 P:y -7.128 1.33 24 S  
 25 1.30% 1 P:x -5.430 0.67 11 C  
 -1.21% 2 P:x 4.600 0.00 12 C  
 1.20% 2 P:x -7.128 1.33 24 S  
 -1.07% 2 P:x 7.646 0.00 2 N  
 -3.741 0.00 56 A 37.55% 1 P:x -5.430 0.67 13 C  
 30 17.26% 1 P:x -5.430 0.67 14 C  
 14.07% 1 P:x -5.430 0.67 10 C  
 10.63% 1 P:x -5.430 0.67 7 C  
 8.55% 1 P:x -5.430 0.67 8 C  
 8.53% 1 P:x -7.265 1.00 2 N  
 35 -2.23% 2 P:x 4.600 0.00 13 C  
 -2.12% 2 P:x 4.600 0.00 14 C  
 1.82% 1 P:x -5.430 0.67 9 C  
 1.51% 1 P:x 10.964 0.00 31 H  
 -2.751 0.00 57 A 31.09% 1 P:x -5.430 0.67 9 C  
 40 27.32% 1 P:x -5.430 0.67 11 C  
 22.08% 1 P:x -5.430 0.67 8 C  
 17.10% 1 P:x -7.265 1.00 2 N  
 -3.45% 2 P:x 4.600 0.00 9 C  
 -2.48% 2 P:x 7.646 0.00 2 N  
 45 -1.95% 2 P:x 4.600 0.00 8 C  
 -1.36% 2 P:x 4.600 0.00 11 C  
 1.19% 1 P:x 10.964 0.00 27 H  
 1.11% 1 P:x -5.430 0.67 14 C

50 \*\*\* SPIN 2 \*\*\*

E(eV) Occ MO % SFO (first member) E(eV) Occ Fragment

55 -----  
 -7.247 1.00 50 A 34.40% 1 D:xy -5.630 2.00 1 Cu  
 13.17% 1 P:x -5.430 0.67 11 C

13.12% 1 P:x -5.430 0.67 8 C  
 12.50% 1 P:x -5.430 0.67 13 C  
 7.93% 1 P:x -5.430 0.67 10 C  
 6.04% 1 P:x -5.430 0.67 14 C  
 5 3.25% 1 P:x -5.430 0.67 7 C  
 1.39% 1 P:x -5.430 0.67 9 C  
 1.14% 2 P:y -7.128 1.33 24 S  
 -7.029 1.00 47 B 60.98% 1 D:yz -5.630 2.00 1 Cu  
 7.50% 1 P:y -7.265 1.00 2 N  
 10 3.82% 2 P:y -7.128 1.33 24 S  
 3.34% 2 P:x -7.128 1.33 24 S  
 3.33% 1 P:x -5.430 0.67 15 C  
 2.37% 1 P:z -5.430 0.67 15 C  
 2.25% 1 P:y -5.430 0.67 15 C  
 15 1.64% 2 P:z -7.128 1.33 24 S  
 1.42% 2 S -18.424 2.00 2 N  
 1.42% 3 P:y -0.074 0.00 1 Cu  
 -6.949 1.00 51 A 42.26% 1 D:xy -5.630 2.00 1 Cu  
 13.84% 1 P:x -5.430 0.67 13 C  
 20 10.11% 1 P:x -5.430 0.67 10 C  
 8.22% 1 P:x -5.430 0.67 7 C  
 4.52% 1 P:x -5.430 0.67 14 C  
 3.76% 1 P:x -5.430 0.67 8 C  
 2.67% 1 P:x -7.265 1.00 2 N  
 25 2.30% 1 P:x -5.430 0.67 9 C  
 1.70% 1 P:z -5.430 0.67 15 C  
 1.58% 2 P:y -7.128 1.33 24 S  
 1.08% 1 P:y -5.430 0.67 15 C  
 1.02% 2 P:z -7.128 1.33 24 S  
 30 -6.464 1.00 52 A 31.97% 1 D:z2 -5.630 2.00 1 Cu  
 27.47% 1 D:x2-y2 -5.630 2.00 1 Cu  
 8.73% 2 P:z -7.128 1.33 24 S  
 5.54% 1 P:z -7.265 1.00 3 N  
 4.91% 2 P:x -7.128 1.33 24 S  
 35 3.69% 3 P:z -0.074 0.00 1 Cu  
 3.06% 1 P:x -5.430 0.67 15 C  
 2.60% 1 P:z -5.430 0.67 15 C  
 2.19% 1 P:y -7.265 1.00 4 N  
 1.70% 2 S -18.424 2.00 4 N  
 40 1.10% 2 S -18.424 2.00 3 N  
 -6.256 1.00 48 B 51.17% 1 D:xz -5.630 2.00 1 Cu  
 8.35% 2 P:x -7.128 1.33 24 S  
 6.17% 1 P:y -7.265 1.00 4 N  
 6.13% 2 S -18.424 2.00 4 N  
 45 4.82% 3 P:x -0.074 0.00 1 Cu  
 2.96% 1 P:z -7.265 1.00 4 N  
 2.46% 1 P:x -5.430 0.67 14 C  
 2.12% 1 P:x -5.430 0.67 15 C  
 1.78% 1 P:x -5.430 0.67 8 C  
 50 1.78% 1 P:x -5.430 0.67 12 C  
 1.69% 1 D:yz -5.630 2.00 1 Cu  
 1.36% 1 P:x -5.430 0.67 11 C  
 1.19% 1 P:y -5.430 0.67 15 C  
 -5.356 1.00 53 A 40.49% 2 P:x -7.128 1.33 24 S  
 55 12.95% 1 P:y -7.265 1.00 4 N  
 9.09% 1 P:x -7.265 1.00 4 N  
 8.93% 2 P:y -7.128 1.33 24 S  
 7.63% 1 D:x2-y2 -5.630 2.00 1 Cu



---

2.72% 2 S -18.424 2.00 4 N  
 2.70% 2 P:z -7.128 1.33 24 S  
 2.60% 1 D:z2 -5.630 2.00 1 Cu  
 2.44% 1 P:y -7.265 1.00 2 N  
 5 1.68% 1 D:xy -5.630 2.00 1 Cu  
 1.53% 1 P:z -7.265 1.00 3 N  
 -5.091 1.00 49 B 36.93% 2 P:z -7.128 1.33 24 S  
 21.09% 2 P:y -7.128 1.33 24 S  
 12.15% 1 P:y -7.265 1.00 4 N  
 10 11.50% 1 P:z -7.265 1.00 4 N  
 3.30% 2 P:x -7.128 1.33 24 S  
 2.20% 1 D:yz -5.630 2.00 1 Cu  
 1.22% 3 P:x -0.074 0.00 1 Cu  
 1.03% 1 P:x -5.430 0.67 9 C  
 15 -4.809 1.00 50 B 49.49% 2 P:x -7.128 1.33 24 S  
 21.79% 1 P:x -7.265 1.00 4 N  
 11.99% 2 P:z -7.128 1.33 24 S  
 4.58% 1 D:xz -5.630 2.00 1 Cu  
 4.31% 1 P:z -7.265 1.00 4 N  
 20 -4.807 1.00 54 A 39.77% 2 P:z -7.128 1.33 24 S  
 17.08% 1 P:z -7.265 1.00 4 N  
 11.45% 2 P:x -7.128 1.33 24 S  
 8.88% 2 P:y -7.128 1.33 24 S  
 7.97% 1 D:z2 -5.630 2.00 1 Cu  
 25 4.26% 1 P:x -7.265 1.00 4 N  
 2.82% 1 P:y -7.265 1.00 4 N  
 2.06% 1 D:x2-y2 -5.630 2.00 1 Cu  
 1.33% 1 P:z -7.265 1.00 3 N  
 -4.387 0.00 55 A 21.27% 1 D:x2-y2 -5.630 2.00 1 Cu  
 30 17.53% 1 D:z2 -5.630 2.00 1 Cu  
 14.98% 1 P:y -7.265 1.00 2 N  
 7.81% 2 P:x -7.128 1.33 24 S  
 6.17% 1 P:z -7.265 1.00 3 N  
 5.29% 2 P:y -7.128 1.33 24 S  
 35 4.23% 2 S -18.424 2.00 2 N  
 3.54% 1 P:x -7.265 1.00 4 N  
 1.80% 1 P:z -7.265 1.00 4 N  
 1.56% 2 P:z -7.128 1.33 24 S  
 1.49% 2 D:x2-y2 11.536 0.00 1 Cu  
 40 1.32% 1 D:xy -5.630 2.00 1 Cu  
 1.11% 1 P:z -7.265 1.00 2 N  
 1.08% 2 S -18.424 2.00 3 N  
 1.06% 2 D:z2 11.536 0.00 1 Cu

## [Cu(L<sub>3</sub>')(NCS)<sub>2</sub>] in C<sub>s</sub> Symmetry

List of all MOs, ordered by energy, with the most significant SFO gross populations

Each percentage contribution in the table below corresponds to the indicated SFO.  
 In general, a SFO may be a linear combination of several Fragment Orbitals on the same,  
 or on symmetry-related Fragments. Only the first 'member' of such a combination is  
 specified here. A full definition of all SFOs is given in an earlier part of the output.  
 The numbering of the SFOs in this table does NOT include the Core Orbitals, and starts  
 from one for each symmetry representation, as in the SFO definition list earlier.

\*\*\* SPIN 1 \*\*\*

| E(eV)  | Occ  | MO     | %      | SFO (first member)                 | E(eV)  | Occ  | Fragment |
|--------|------|--------|--------|------------------------------------|--------|------|----------|
| -7.050 | 1.00 | 56 AAA | 38.15% | 1 D:xz                             | -5.630 | 2.00 | 1 Cu     |
|        |      | 25.87% | 1 D:yz | -5.630                             | 2.00   | 1 Cu |          |
|        |      | 6.92%  | 1 P:z  | -5.430                             | 0.67   | 9 C  |          |
|        |      | 5.85%  | 2 P:z  | -7.128                             | 1.33   | 3 S  |          |
|        |      | 4.21%  | 1 P:x  | -5.430                             | 0.67   | 14 C |          |
|        |      | 3.13%  | 1 P:x  | -5.430                             | 0.67   | 11 C |          |
|        |      | 2.64%  | 1 P:z  | -7.265                             | 1.00   | 6 N  |          |
|        |      | 2.11%  | 1 P:x  | -5.430                             | 0.67   | 13 C |          |
|        |      | 1.17%  | 1 P:x  | -5.430                             | 0.67   | 17 C |          |
| -6.783 | 1.00 | 57 AAA | 21.19% | 1 P:x                              | -5.430 | 0.67 | 17 C     |
|        |      | 13.95% | 1 P:x  | -5.430                             | 0.67   | 12 C |          |
|        |      | 11.94% | 1 P:x  | -5.430                             | 0.67   | 14 C |          |
|        |      | 11.53% | 1 D:yz | -5.630                             | 2.00   | 1 Cu |          |
|        |      | 9.20%  | 1 P:x  | -5.430                             | 0.67   | 16 C |          |
|        |      | 8.62%  | 1 P:x  | -5.430                             | 0.67   | 11 C |          |
|        |      | 7.36%  | 1 P:x  | -5.430                             | 0.67   | 15 C |          |
|        |      | 1.71%  | 1 P:z  | -7.265                             | 1.00   | 6 N  |          |
| -6.622 | 1.00 | 58 AAA | 33.19% | 1 D:xz                             | -5.630 | 2.00 | 1 Cu     |
|        |      | 25.61% | 1 D:yz | -5.630                             | 2.00   | 1 Cu |          |
|        |      | 5.61%  | 1 P:z  | -5.430                             | 0.67   | 10 C |          |
|        |      | 4.79%  | 1 P:x  | -5.430                             | 0.67   | 17 C |          |
|        |      | 4.78%  | 2 P:z  | -7.128                             | 1.33   | 2 S  |          |
|        |      | 4.47%  | 1 P:z  | -7.265                             | 1.00   | 6 N  |          |
|        |      | 3.04%  | 1 P:x  | -5.430                             | 0.67   | 12 C |          |
|        |      | 2.99%  | 1 P:x  | -7.265                             | 1.00   | 6 N  |          |
|        |      | 2.67%  | 1 P:x  | -5.430                             | 0.67   | 15 C |          |
|        |      | 1.72%  | 1 P:x  | -5.430                             | 0.67   | 13 C |          |
|        |      | 1.60%  | 1 P:x  | -5.430                             | 0.67   | 16 C |          |
|        |      | 1.06%  | 3 P:z  | -0.074                             | 0.00   | 1 Cu |          |
|        |      | 1.05%  | 2 S    | -18.424                            | 2.00   | 6 N  |          |
| -6.302 | 1.00 | 89 AA  | 43.16% | 1 D:x <sup>2</sup> -y <sup>2</sup> | -5.630 | 2.00 | 1 Cu     |
|        |      | 17.57% | 1 D:xy | -5.630                             | 2.00   | 1 Cu |          |
|        |      | 6.82%  | 2 P:y  | -7.128                             | 1.33   | 2 S  |          |
|        |      | 5.11%  | 1 P:y  | -5.430                             | 0.67   | 10 C |          |
|        |      | 3.97%  | 1 P:y  | -7.265                             | 1.00   | 7 N  |          |
|        |      | 2.94%  | 3 P:y  | -0.074                             | 0.00   | 1 Cu |          |
|        |      | 2.36%  | 1 P:y  | -7.265                             | 1.00   | 4 N  |          |
|        |      | 1.97%  | 2 S    | -18.424                            | 2.00   | 4 N  |          |

|    |        |      |        |           |         |        |      |      |
|----|--------|------|--------|-----------|---------|--------|------|------|
|    |        |      | 1.69%  | 2 P:x     | -7.128  | 1.33   | 3 S  |      |
|    |        |      | 1.56%  | 1 P:x     | -5.430  | 0.67   | 9 C  |      |
|    |        |      | 1.38%  | 2 P:y     | -7.128  | 1.33   | 3 S  |      |
|    | -5.929 | 1.00 | 90 AA  | 36.82%    | 1 D:xy  | -5.630 | 2.00 | 1 Cu |
| 5  |        |      | 13.18% | 2 P:x     | -7.128  | 1.33   | 3 S  |      |
|    |        |      | 9.48%  | 1 D:x2-y2 | -5.630  | 2.00   | 1 Cu |      |
|    |        |      | 5.94%  | 3 P:x     | -0.074  | 0.00   | 1 Cu |      |
|    |        |      | 3.97%  | 1 P:x     | -7.265  | 1.00   | 5 N  |      |
|    |        |      | 3.40%  | 2 S       | -18.424 | 2.00   | 5 N  |      |
| 10 |        |      | 2.96%  | 1 P:y     | -7.265  | 1.00   | 4 N  |      |
|    |        |      | 2.67%  | 1 P:x     | -5.430  | 0.67   | 9 C  |      |
|    |        |      | 2.46%  | 1 P:y     | -7.265  | 1.00   | 7 N  |      |
|    |        |      | 1.67%  | 2 S       | -18.424 | 2.00   | 4 N  |      |
|    |        |      | 1.47%  | 1 P:x     | -5.430  | 0.67   | 16 C |      |
| 15 |        |      | 1.20%  | 2 P:y     | -7.128  | 1.33   | 3 S  |      |
|    |        |      | 1.17%  | 1 P:x     | -5.430  | 0.67   | 18 C |      |
|    |        |      | 1.13%  | 1 D:z2    | -5.630  | 2.00   | 1 Cu |      |
|    |        |      | 1.05%  | 2 D:xy    | 11.536  | 0.00   | 1 Cu |      |
|    |        |      | 1.03%  | 1 P:x     | -5.430  | 0.67   | 14 C |      |
| 20 | -5.027 | 1.00 | 91 AA  | 38.26%    | 1 D:z2  | -5.630 | 2.00 | 1 Cu |
|    |        |      | 15.90% | 1 P:z     | -7.265  | 1.00   | 6 N  |      |
|    |        |      | 7.49%  | 2 P:x     | -7.128  | 1.33   | 3 S  |      |
|    |        |      | 4.89%  | 1 P:y     | -7.265  | 1.00   | 7 N  |      |
|    |        |      | 4.37%  | 2 S       | -18.424 | 2.00   | 6 N  |      |
| 25 |        |      | 3.18%  | 2 D:z2    | 11.536  | 0.00   | 1 Cu |      |
|    |        |      | 3.03%  | 1 P:y     | -7.265  | 1.00   | 4 N  |      |
|    |        |      | 1.91%  | 1 P:x     | -7.265  | 1.00   | 5 N  |      |
|    |        |      | 1.82%  | 1 P:x     | -7.265  | 1.00   | 4 N  |      |
|    |        |      | 1.79%  | 2 S       | -18.424 | 2.00   | 5 N  |      |
| 30 |        |      | 1.43%  | 2 S       | -18.424 | 2.00   | 4 N  |      |
|    |        |      | 1.34%  | 1 P:y     | -7.265  | 1.00   | 6 N  |      |
|    |        |      | 1.23%  | 1 S       | -6.357  | 1.00   | 38 H |      |
|    | -4.795 | 1.00 | 59 AAA | 66.98%    | 2 P:z   | -7.128 | 1.33 | 3 S  |
|    |        |      | 25.54% | 1 P:z     | -7.265  | 1.00   | 4 N  |      |
| 35 |        |      | 2.48%  | 1 D:yz    | -5.630  | 2.00   | 1 Cu |      |
|    |        |      | 1.55%  | 1 D:yz    | 33.631  | 0.00   | 9 C  |      |
|    |        |      | 1.12%  | 1 D:xz    | -5.630  | 2.00   | 1 Cu |      |
|    | -4.669 | 1.00 | 92 AA  | 40.75%    | 2 P:x   | -7.128 | 1.33 | 3 S  |
|    |        |      | 17.70% | 1 P:x     | -7.265  | 1.00   | 4 N  |      |
| 40 |        |      | 7.84%  | 1 D:x2-y2 | -5.630  | 2.00   | 1 Cu |      |
|    |        |      | 7.34%  | 2 P:y     | -7.128  | 1.33   | 3 S  |      |
|    |        |      | 4.96%  | 1 D:z2    | -5.630  | 2.00   | 1 Cu |      |
|    |        |      | 4.37%  | 1 D:xy    | -5.630  | 2.00   | 1 Cu |      |
|    |        |      | 3.22%  | 1 P:y     | -7.265  | 1.00   | 7 N  |      |
| 45 |        |      | 2.96%  | 1 P:z     | -7.265  | 1.00   | 6 N  |      |
|    |        |      | 1.18%  | 1 P:y     | -7.265  | 1.00   | 4 N  |      |
|    | -4.435 | 1.00 | 93 AA  | 60.01%    | 2 P:y   | -7.128 | 1.33 | 2 S  |
|    |        |      | 22.88% | 1 P:y     | -7.265  | 1.00   | 5 N  |      |
|    |        |      | 5.78%  | 2 P:x     | -7.128  | 1.33   | 2 S  |      |
| 50 |        |      | 3.90%  | 1 D:x2-y2 | -5.630  | 2.00   | 1 Cu |      |
|    |        |      | 2.04%  | 1 P:x     | -7.265  | 1.00   | 5 N  |      |
|    |        |      | 1.17%  | 1 D:xy    | 33.631  | 0.00   | 10 C |      |
|    | -4.387 | 1.00 | 60 AAA | 68.44%    | 2 P:z   | -7.128 | 1.33 | 2 S  |
|    |        |      | 25.50% | 1 P:z     | -7.265  | 1.00   | 5 N  |      |
| 55 |        |      | 1.98%  | 1 D:xz    | -5.630  | 2.00   | 1 Cu |      |
|    |        |      | 1.60%  | 1 D:xz    | 33.631  | 0.00   | 10 C |      |
|    | -3.404 | 0.00 | 61 AAA | 36.20%    | 1 P:x   | -5.430 | 0.67 | 17 C |
|    |        |      | 16.88% | 1 P:x     | -5.430  | 0.67   | 16 C |      |

|        |       |        |      |      |
|--------|-------|--------|------|------|
| 13.12% | 1 P:x | -5.430 | 0.67 | 12 C |
| 10.27% | 1 P:x | -5.430 | 0.67 | 15 C |
| 8.74%  | 1 P:x | -5.430 | 0.67 | 14 C |
| 7.23%  | 1 P:x | -7.265 | 1.00 | 6 N  |
| -2.17% | 2 P:x | 4.600  | 0.00 | 17 C |
| -2.13% | 2 P:x | 4.600  | 0.00 | 16 C |
| 1.55%  | 1 P:x | -5.430 | 0.67 | 13 C |
| 1.55%  | 1 P:x | 10.964 | 0.00 | 41 H |

\*\*\* SPIN 2 \*\*\*

| E(eV)  | Occ  | MO     | %      | SFO (first member) | E(eV)  | Occ  | Fragment |
|--------|------|--------|--------|--------------------|--------|------|----------|
| -6.848 | 1.00 | 56 AAA | 22.04% | 1 D:xz             | -5.630 | 2.00 | 1 Cu     |
|        |      | 14.00% | 1 P:x  | -5.430             | 0.67   | 17 C |          |
|        |      | 11.87% | 1 P:x  | -5.430             | 0.67   | 14 C |          |
|        |      | 10.20% | 1 D:yz | -5.630             | 2.00   | 1 Cu |          |
|        |      | 9.29%  | 1 P:x  | -5.430             | 0.67   | 11 C |          |
|        |      | 7.50%  | 1 P:x  | -5.430             | 0.67   | 12 C |          |
|        |      | 6.57%  | 1 P:x  | -5.430             | 0.67   | 16 C |          |
|        |      | 4.03%  | 1 P:x  | -5.430             | 0.67   | 15 C |          |
|        |      | 2.60%  | 2 P:z  | -7.128             | 1.33   | 3 S  |          |
|        |      | 2.58%  | 1 P:z  | -5.430             | 0.67   | 9 C  |          |
| -6.705 | 1.00 | 57 AAA | 25.06% | 1 D:yz             | -5.630 | 2.00 | 1 Cu     |
|        |      | 17.07% | 1 D:xz | -5.630             | 2.00   | 1 Cu |          |
|        |      | 12.00% | 1 P:x  | -5.430             | 0.67   | 17 C |          |
|        |      | 8.85%  | 1 P:x  | -5.430             | 0.67   | 12 C |          |
|        |      | 5.18%  | 1 P:x  | -5.430             | 0.67   | 15 C |          |
|        |      | 4.69%  | 1 P:x  | -5.430             | 0.67   | 16 C |          |
|        |      | 4.63%  | 2 P:z  | -7.128             | 1.33   | 3 S  |          |
|        |      | 4.01%  | 1 P:z  | -5.430             | 0.67   | 9 C  |          |
|        |      | 3.51%  | 1 P:x  | -5.430             | 0.67   | 14 C |          |
|        |      | 2.16%  | 1 P:z  | -7.265             | 1.00   | 6 N  |          |
|        |      | 1.96%  | 1 P:x  | -5.430             | 0.67   | 11 C |          |
|        |      | 1.90%  | 1 P:x  | -7.265             | 1.00   | 6 N  |          |
| -6.366 | 1.00 | 58 AAA | 36.94% | 1 D:xz             | -5.630 | 2.00 | 1 Cu     |
|        |      | 32.55% | 1 D:yz | -5.630             | 2.00   | 1 Cu |          |
|        |      | 5.68%  | 2 P:z  | -7.128             | 1.33   | 2 S  |          |
|        |      | 5.30%  | 1 P:z  | -5.430             | 0.67   | 10 C |          |
|        |      | 4.47%  | 1 P:z  | -7.265             | 1.00   | 6 N  |          |
|        |      | 1.74%  | 1 P:x  | -7.265             | 1.00   | 6 N  |          |
|        |      | 1.54%  | 1 P:x  | -5.430             | 0.67   | 13 C |          |
|        |      | 1.29%  | 1 P:x  | -5.430             | 0.67   | 17 C |          |
|        |      | 1.27%  | 3 P:z  | -0.074             | 0.00   | 1 Cu |          |
|        |      | 1.16%  | 1 P:x  | -5.430             | 0.67   | 15 C |          |
|        |      | 1.04%  | 2 S    | -18.424            | 2.00   | 6 N  |          |
| -6.039 | 1.00 | 89 AA  | 46.65% | 1 D:x2-y2          | -5.630 | 2.00 | 1 Cu     |
|        |      | 14.96% | 1 D:xy | -5.630             | 2.00   | 1 Cu |          |
|        |      | 7.51%  | 2 P:y  | -7.128             | 1.33   | 2 S  |          |
|        |      | 4.62%  | 1 P:y  | -5.430             | 0.67   | 10 C |          |
|        |      | 4.24%  | 1 P:y  | -7.265             | 1.00   | 7 N  |          |
|        |      | 3.09%  | 3 P:y  | -0.074             | 0.00   | 1 Cu |          |
|        |      | 2.50%  | 2 P:x  | -7.128             | 1.33   | 3 S  |          |
|        |      | 1.63%  | 1 P:x  | -5.430             | 0.67   | 9 C  |          |
|        |      | 1.56%  | 1 P:y  | -7.265             | 1.00   | 4 N  |          |

|    |        |      |        |           |         |        |      |      |
|----|--------|------|--------|-----------|---------|--------|------|------|
|    |        |      | 1.47%  | 2 S       | -18.424 | 2.00   | 4 N  |      |
|    |        |      | 1.45%  | 2 P:y     | -7.128  | 1.33   | 3 S  |      |
|    | -5.683 | 1.00 | 90 AA  | 39.85%    | 1 D:xy  | -5.630 | 2.00 | 1 Cu |
|    |        |      | 14.79% | 2 P:x     | -7.128  | 1.33   | 3 S  |      |
| 5  |        |      | 6.53%  | 1 D:x2-y2 | -5.630  | 2.00   | 1 Cu |      |
|    |        |      | 6.01%  | 3 P:x     | -0.074  | 0.00   | 1 Cu |      |
|    |        |      | 3.29%  | 1 P:x     | -7.265  | 1.00   | 5 N  |      |
|    |        |      | 3.11%  | 1 P:y     | -7.265  | 1.00   | 4 N  |      |
|    |        |      | 2.95%  | 2 S       | -18.424 | 2.00   | 5 N  |      |
| 10 |        |      | 2.43%  | 1 P:x     | -5.430  | 0.67   | 9 C  |      |
|    |        |      | 1.79%  | 1 P:x     | -5.430  | 0.67   | 16 C |      |
|    |        |      | 1.78%  | 1 D:z2    | -5.630  | 2.00   | 1 Cu |      |
|    |        |      | 1.62%  | 1 P:x     | -7.265  | 1.00   | 4 N  |      |
|    |        |      | 1.53%  | 2 S       | -18.424 | 2.00   | 4 N  |      |
| 15 |        |      | 1.47%  | 2 P:y     | -7.128  | 1.33   | 3 S  |      |
|    |        |      | 1.35%  | 1 P:x     | -5.430  | 0.67   | 18 C |      |
|    |        |      | 1.22%  | 1 P:y     | -7.265  | 1.00   | 7 N  |      |
|    |        |      | 1.04%  | 1 P:x     | -5.430  | 0.67   | 13 C |      |
|    | -4.724 | 1.00 | 59 AAA | 65.93%    | 2 P:z   | -7.128 | 1.33 | 3 S  |
| 20 |        |      | 25.35% | 1 P:z     | -7.265  | 1.00   | 4 N  |      |
|    |        |      | 3.31%  | 1 D:yz    | -5.630  | 2.00   | 1 Cu |      |
|    |        |      | 1.54%  | 1 D:yz    | 33.631  | 0.00   | 9 C  |      |
|    |        |      | 1.46%  | 1 D:xz    | -5.630  | 2.00   | 1 Cu |      |
|    | -4.665 | 1.00 | 91 AA  | 33.54%    | 2 P:x   | -7.128 | 1.33 | 3 S  |
| 25 |        |      | 16.19% | 1 D:z2    | -5.630  | 2.00   | 1 Cu |      |
|    |        |      | 12.31% | 1 P:x     | -7.265  | 1.00   | 4 N  |      |
|    |        |      | 4.49%  | 2 P:y     | -7.128  | 1.33   | 3 S  |      |
|    |        |      | 4.40%  | 1 P:z     | -7.265  | 1.00   | 6 N  |      |
|    |        |      | 3.89%  | 1 D:x2-y2 | -5.630  | 2.00   | 1 Cu |      |
| 30 |        |      | 3.77%  | 1 P:y     | -7.265  | 1.00   | 4 N  |      |
|    |        |      | 3.17%  | 1 D:xy    | -5.630  | 2.00   | 1 Cu |      |
|    |        |      | 2.43%  | 2 P:y     | -7.128  | 1.33   | 2 S  |      |
|    |        |      | 2.43%  | 1 P:x     | -7.265  | 1.00   | 5 N  |      |
|    |        |      | 2.05%  | 2 S       | -18.424 | 2.00   | 5 N  |      |
| 35 |        |      | 1.32%  | 2 S       | -18.424 | 2.00   | 6 N  |      |
|    | -4.333 | 1.00 | 60 AAA | 67.70%    | 2 P:z   | -7.128 | 1.33 | 2 S  |
|    |        |      | 25.30% | 1 P:z     | -7.265  | 1.00   | 5 N  |      |
|    |        |      | 2.63%  | 1 D:xz    | -5.630  | 2.00   | 1 Cu |      |
|    |        |      | 1.59%  | 1 D:xz    | 33.631  | 0.00   | 10 C |      |
| 40 |        |      | 1.01%  | 1 D:yz    | -5.630  | 2.00   | 1 Cu |      |
|    | -4.311 | 1.00 | 92 AA  | 49.27%    | 2 P:y   | -7.128 | 1.33 | 2 S  |
|    |        |      | 18.87% | 1 P:y     | -7.265  | 1.00   | 5 N  |      |
|    |        |      | 9.70%  | 1 D:x2-y2 | -5.630  | 2.00   | 1 Cu |      |
|    |        |      | 4.83%  | 2 P:x     | -7.128  | 1.33   | 2 S  |      |
| 45 |        |      | 3.86%  | 2 P:x     | -7.128  | 1.33   | 3 S  |      |
|    |        |      | 2.34%  | 1 P:y     | -7.265  | 1.00   | 7 N  |      |
|    |        |      | 2.11%  | 1 D:z2    | -5.630  | 2.00   | 1 Cu |      |
|    |        |      | 1.51%  | 1 P:x     | -7.265  | 1.00   | 5 N  |      |
|    |        |      | 1.27%  | 1 P:x     | -7.265  | 1.00   | 4 N  |      |
| 50 | -4.197 | 0.00 | 93 AA  | 32.44%    | 1 D:z2  | -5.630 | 2.00 | 1 Cu |
|    |        |      | 11.28% | 1 P:z     | -7.265  | 1.00   | 6 N  |      |
|    |        |      | 8.42%  | 2 P:y     | -7.128  | 1.33   | 2 S  |      |
|    |        |      | 8.27%  | 2 P:x     | -7.128  | 1.33   | 3 S  |      |
|    |        |      | 4.90%  | 1 D:xy    | -5.630  | 2.00   | 1 Cu |      |
| 55 |        |      | 4.85%  | 1 P:x     | -7.265  | 1.00   | 4 N  |      |
|    |        |      | 4.56%  | 1 P:y     | -7.265  | 1.00   | 7 N  |      |
|    |        |      | 3.38%  | 1 P:y     | -7.265  | 1.00   | 5 N  |      |
|    |        |      | 3.27%  | 2 S       | -18.424 | 2.00   | 6 N  |      |

---

|       |           |         |      |      |
|-------|-----------|---------|------|------|
| 2.42% | 2 P:y     | -7.128  | 1.33 | 3 S  |
| 1.94% | 2 D:z2    | 11.536  | 0.00 | 1 Cu |
| 1.25% | 2 S       | -18.424 | 2.00 | 4 N  |
| 1.21% | 1 D:x2-y2 | -5.630  | 2.00 | 1 Cu |

5

10
